# Supplementary material
Source: publisher site journal article supplement (https://www.dovepress.com/article/455158)
Supplement: Supplementary file 1 [file get_supplementary_file.php]

**Supplementary Material**


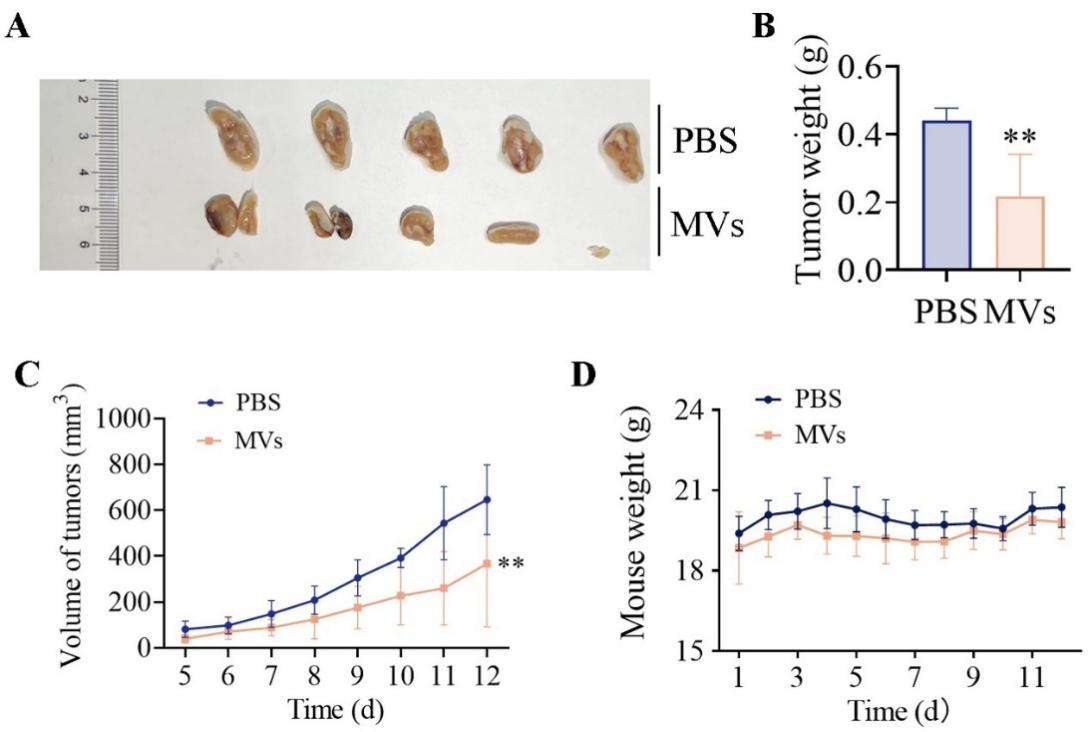


**Supplementary Figure 1.** Antitumor activity of *S. aureus* MVs *in vivo*. BALB/c female mice were subcutaneously injected with CT26 cells at day 0, and intravenously injected with 5 μg of bacterial MVs at day 1, then MV-treatment was performed once every other day up to 11 days. (**A**) Tumor images and (**B**) weights harvested at day 11 posttreatment with MVs. (**C**) Tumor volumes of mice bearing CT26 tumor measured after tumor formation. (**D**) Variation of body weight of tumor-bearing mice during MV-treatment. Data in **B–D** are presented as mean ± SD. Statistical significance was calculated via *t*-test or two-way ANOVA. **p < 0.01.


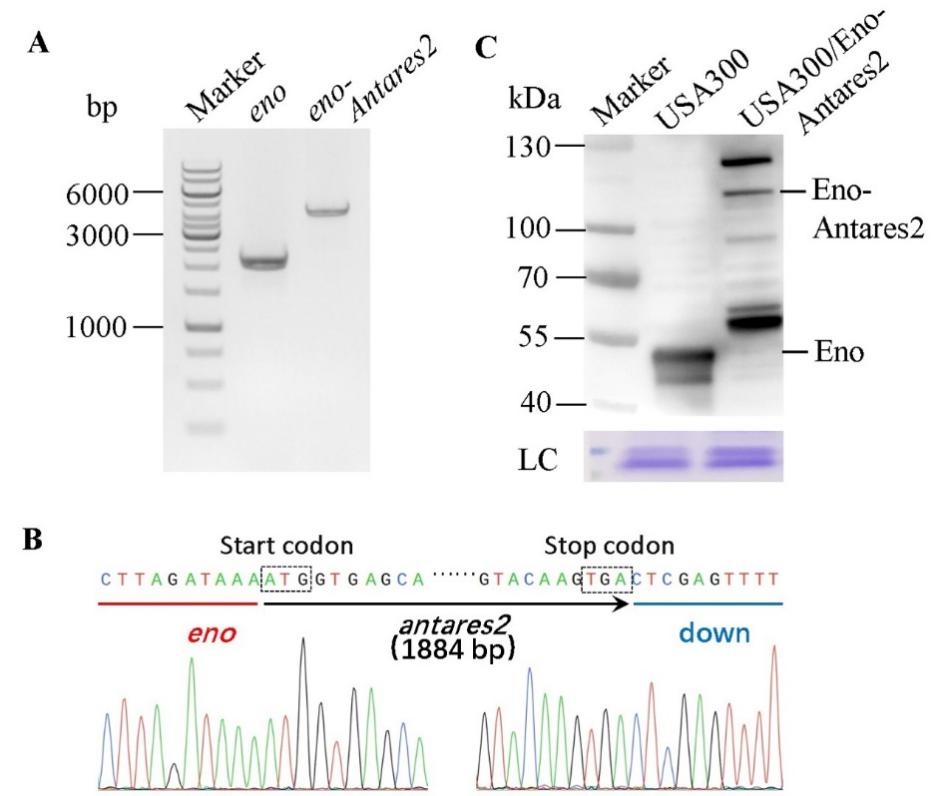


**Supplementary Figure 2.** Construction of luciferase Antares2–MV-produced *S. aureus* strain. (**A**) PCR products of *eno* and *eno-Antares2* analyzed with 1% (w/v) agarose gel electrophoresis. (**B**) Identification of USA300/Eno-Antares2 strain by DNA sequencing. The target *Antares2* gene was in-frame fused with *eno* in the chromosome of *S. aureus* USA300. (**C**) Western blot analysis of Eno–Antares2 produced by USA300/Eno-Antares2. SDS-PAGE gel stained with Coomassie brilliant blue was used as loading control (LC). The size of protein marker is presented on the left.


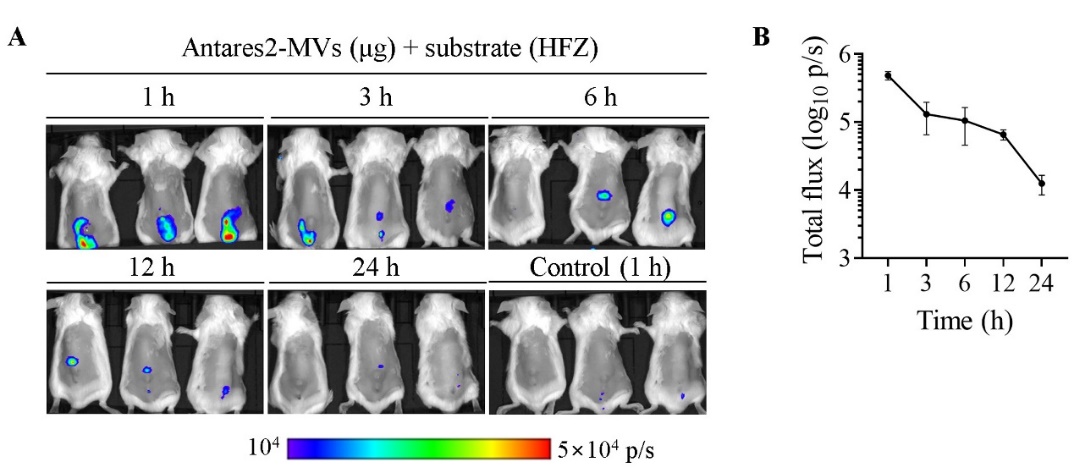


**Supplementary Figure 3.** Accumulation of MVs in tumor tissues. (**A**) Bioluminescence signals of the treated mice. CT26 tumor-bearing mice (*n* = 3) were intravenously injected with 5 μg Antares2–MVs and 100 μmol HFZ substrate. Injection of PBS served as controls. The bioluminescence signals from mice were detected at the time indicated. (**B**) Total photon flux changed over time. Data are presented as mean ± SEM. HFZ, hydrofurimazine.


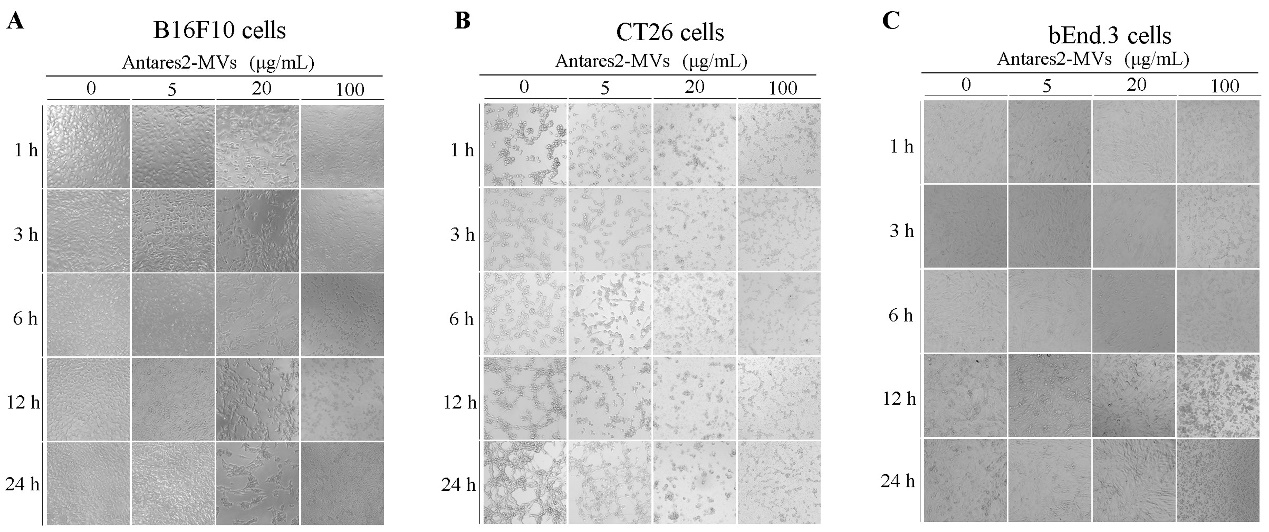


**Supplementary Figure 4.** *S. aureus* MVs killed tumor cells *in vitro*. The viability of (**A**) B16F10, (**B**) CT26, and (**C**) bEnd.3 cells. Cells were treated with various concentrations of MVs (0, 5, 20, and 100 μg/mL) for 1, 3, 6, 12, and 24 h, respectively (*n* = 3 for each group). PBS treatment served as controls (0).


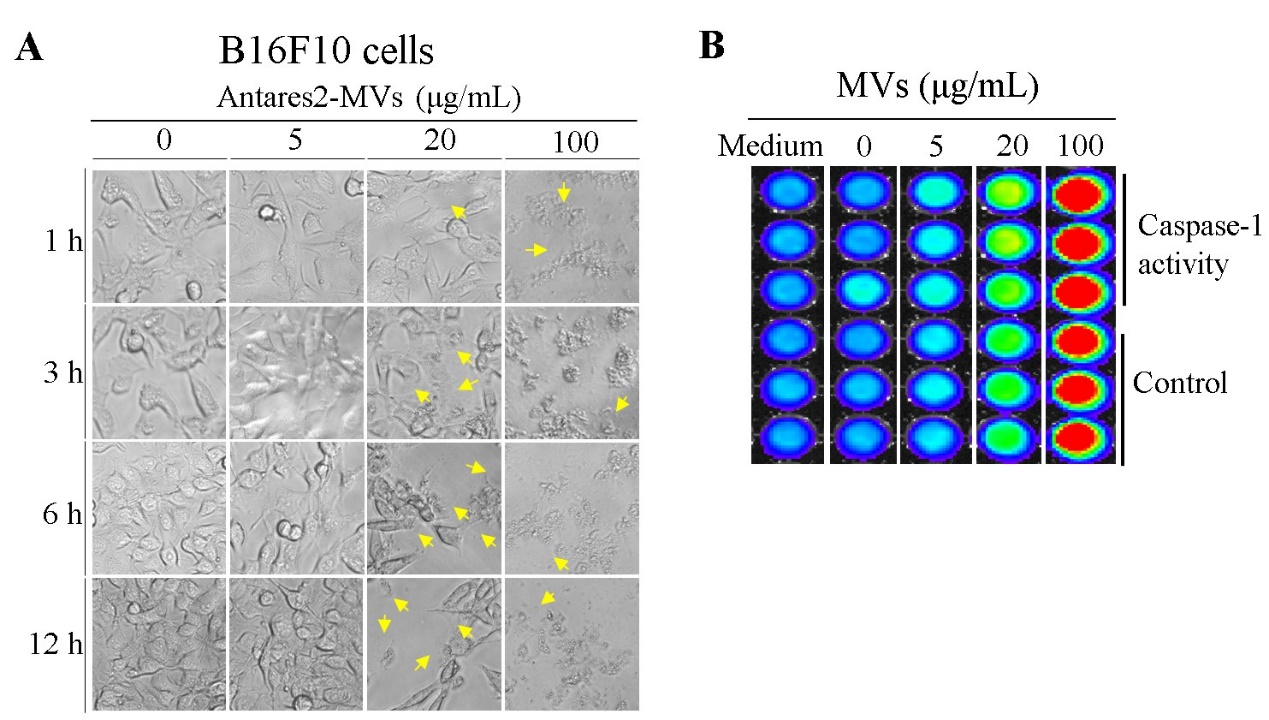


**Supplementary Figure 5.** Antitumor activity of *S. aureus* MVs depended on caspase-1 activation. (**A**) The pyrogenic cells observed after treatment with *S. aureus* MVs. B16F10 cells were treated with increasing concentrations of *S. aureus* MVs for the indicated time, and the photographs were taken. The pyrogenic cells were indicated with yellow arrows. (**B**) Detection of caspase-1 activity. B16F10 cells were incubated with 0, 5, 20 and 100 µg/mL of *S. aureus* MVs for 8 h, and the active caspase-1 in culture supernatant was detected with a kit of Caspase-Glo® 1 Inflammasome Assay. PBS was used as control.
